# Supplementary material for: Thermally controlled biotransformation of glycyrrhizic acidviaan asymmetric temperature-responsive polyurethane membrane
Source: Royal Society of Chemistry journal article supplement (doi:10.1039/c8ra06202a), 2018-01-01
Supplement: c8ra06202a1.pdf [file c8ra06202a1.pdf]

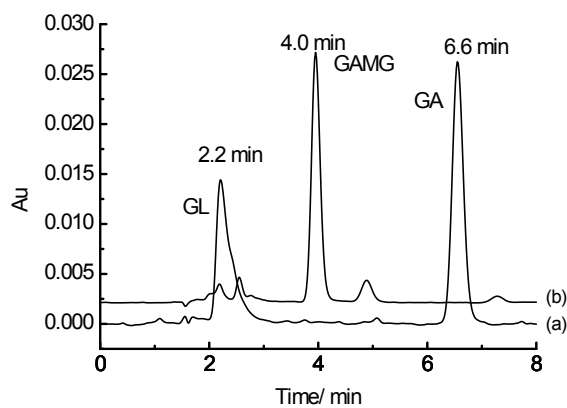

Fig. 1S. HPLC chromatogram of standard GL, GAMG, and GA

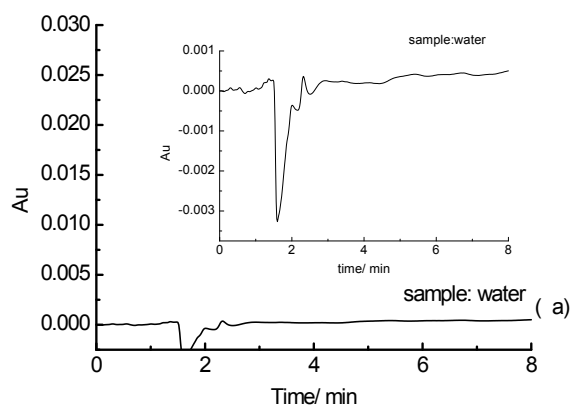

Fig. 2S. HPLC chromatogram of the blank sample

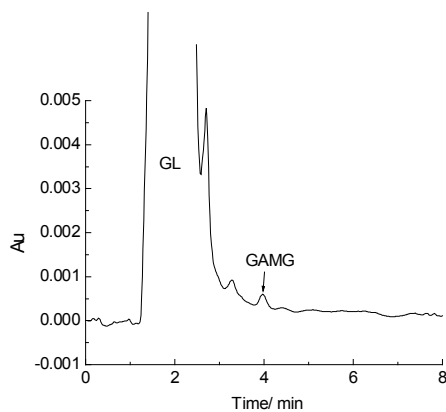

Fig. 3S. HPLC chromatogram of GL reacting with the  $\beta$ -glucuronidase conjugated in TRPU
